# Supplementary material for: The Effects of Antiperspirant Aluminum Chlorohydrate on the Development of Antibiotic Resistance in Staphylococcus epidermidis
Source: MDPI journal article supplement (doi:10.3390/microorganisms11040948), 2023-04-05
Supplement: s1 [file s1]

**Table S1.** The sequences of primers used for the Polymerase Chain Reaction.

| Gene           | Primer | Sequence                  | Tm (°C)/Amplicon (bp) | References |
|----------------|--------|---------------------------|-----------------------|------------|
| <i>mecA</i>    | F      | GGTCCCATTAACCTCTGAAG      | 51/1039               | [29]       |
|                | R      | AGTTCTGCAGTACCGGATTTTGC   |                       |            |
| <i>gyrA</i>    | F      | TGGCTGAATTACCTCAATCA      | 55/284                | [26]       |
|                | R      | GCCATTCTTACCATTGCTT       |                       |            |
| <i>gyrB</i>    | F      | CAGCATTAGACGTTTCAAG       | 53/250                | [25]       |
|                | R      | CCAATACCCGTACCAAATGC      |                       |            |
| <i>parC</i>    | F      | TCGCAATGTATTCAAGTGGG      | 55/197                | [25]       |
|                | R      | ATCGTTATCGATACTACCATT     |                       |            |
| <i>parE</i>    | F      | AAGCTCAACAAGCACGCGAGGCTG  | 55/325                | [25]       |
|                | R      | TTAAAGTCAGTACCAACACCAGCAC |                       |            |
| <i>norA</i>    | F      | GCTATTATCGGTGGAGGCGTG     | 58/434                | [27]       |
|                | R      | TTTGCTTCTTTACGGCGTGAC     |                       |            |
| <i>norB/C</i>  | F      | GCAACTAACCTTGGATGGCG      | 59/563                | [27]       |
|                | R      | ACGGTCAAGGCACTTCCGA       |                       |            |
| <i>16SrRNA</i> | F      | TACACACCGCCCGTCACA        | 55/535                | [28]       |
|                | R      | CTTCGACGGCTAGCTCCAAAT     |                       |            |
